# Supplementary material for: Passivated Porous Silicon Membranes and Their Application to Optical Biosensing
Source: MDPI journal article supplement (doi:10.3390/mi13010010), 2021-12-22
Supplement: s1 [file s1]

# Passivated Porous Silicon Membranes and their Application to Optical Biosensing

Clara Whyte Ferreira <sup>1</sup>, Roselien Vercauteren <sup>1,\*</sup> and Laurent A. Francis <sup>1</sup>

<sup>1</sup> Institute of Information and Communication Technologies Electronics and Applied Mathematics, UCLouvain, 1348 Louvain-la-Neuve, Belgium

\* Correspondence: roselen.vercauteren@uclouvain.be;

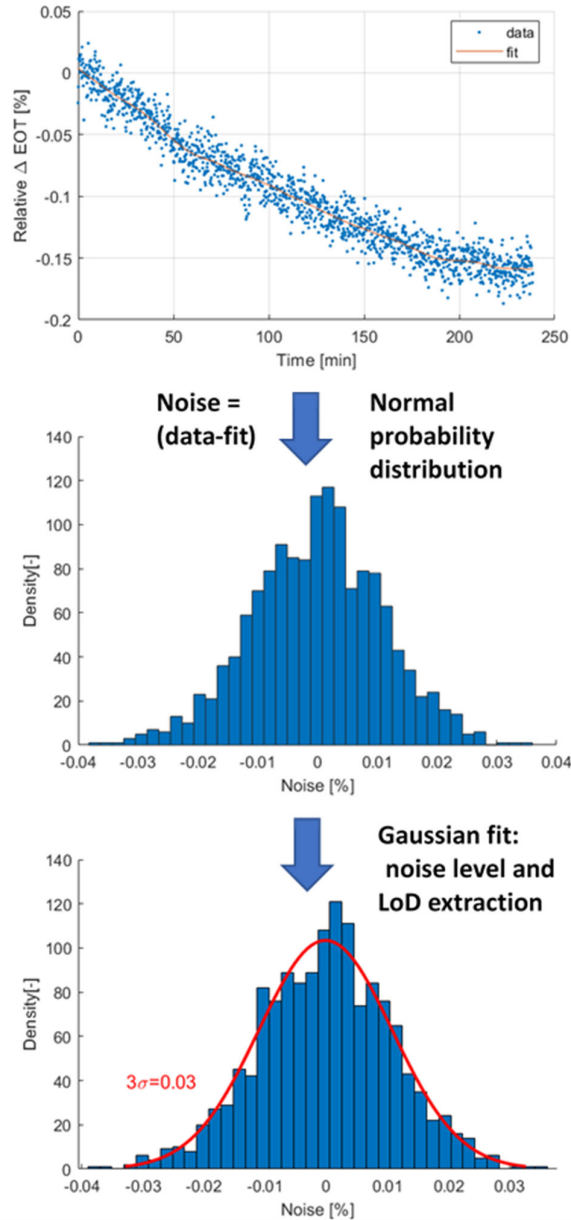

**Figure S1.** Schematic representation of the noise level analysis procedure: (1) the data is fit using a moving average (low pass filter with coefficient equal to the reciprocal of the span, span=0.15), (2) the noise is calculated by taking the difference between the data and the fit, (3) a normal probability distribution is plotted from the calculated noise, (4) a Gaussian fit is applied to the distribution, allowing to extract the noise level  $\sigma_N$ .

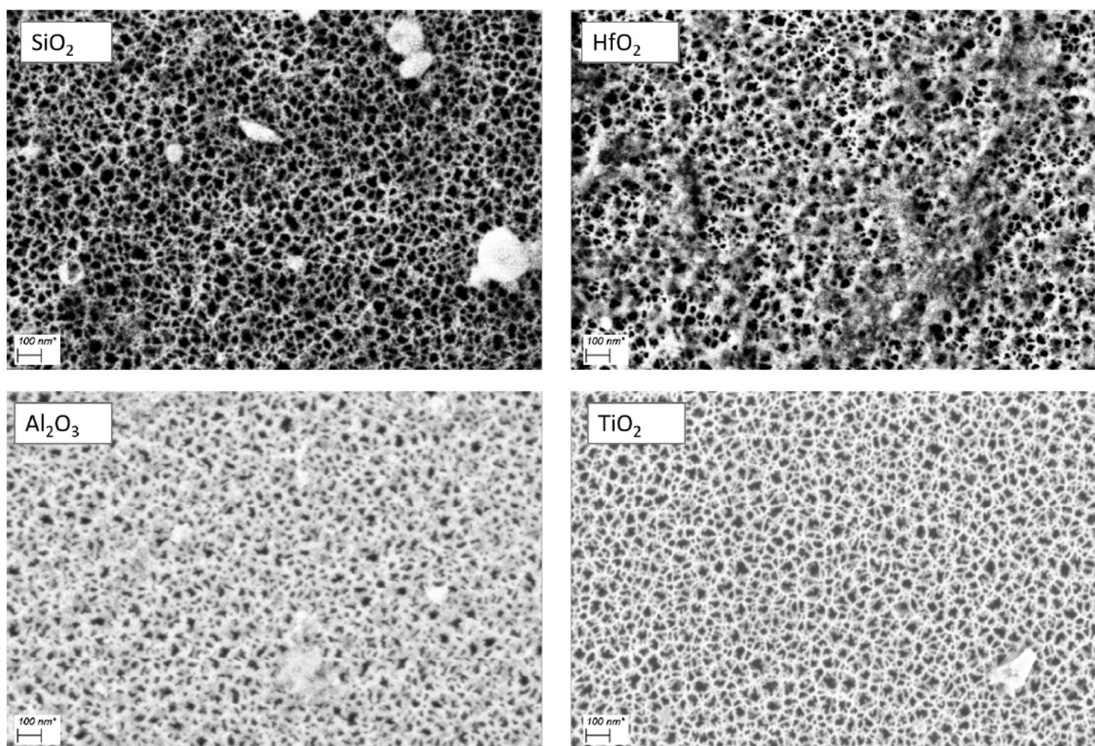

**Figure S2.** SEM images of the surface of porous silicon membranes: PSiO<sub>2</sub>, PSiO<sub>2</sub>/HfO<sub>2</sub>, PSiO<sub>2</sub>/Al<sub>2</sub>O<sub>3</sub> and PSiO<sub>2</sub>/TiO<sub>2</sub>.

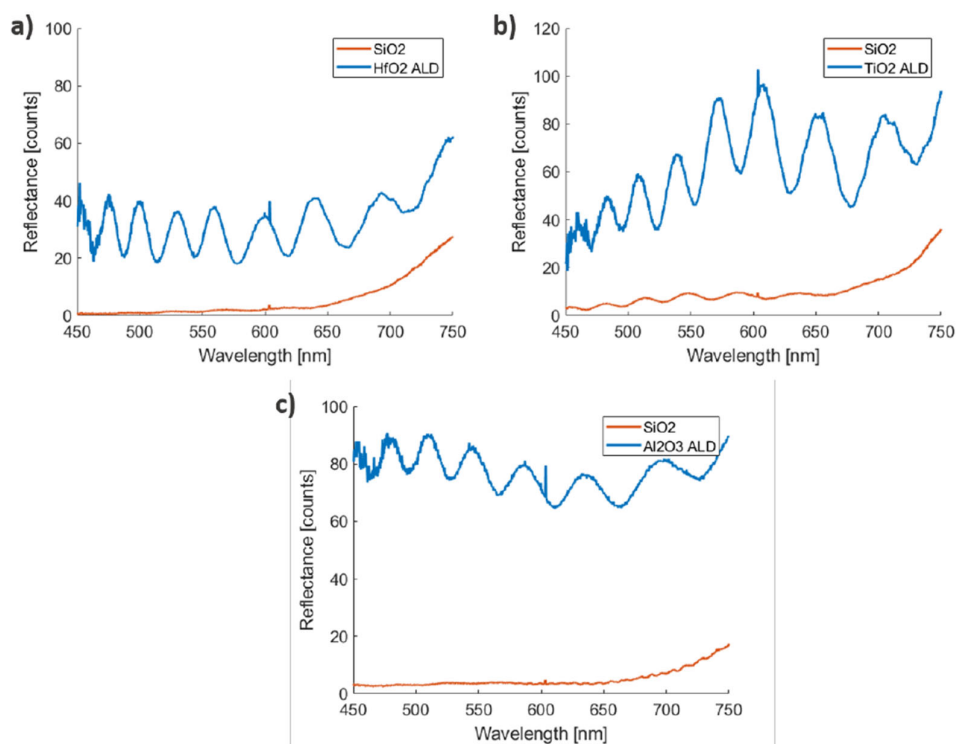

**Figure S3.** Interferometric spectra obtained for (a) PSiO<sub>2</sub>/HfO<sub>2</sub>, (b) PSiO<sub>2</sub>/TiO<sub>2</sub>, and (c) PSiO<sub>2</sub>/Al<sub>2</sub>O<sub>3</sub>, before and after the ALD, at same integration time ( $t = 1$  s).

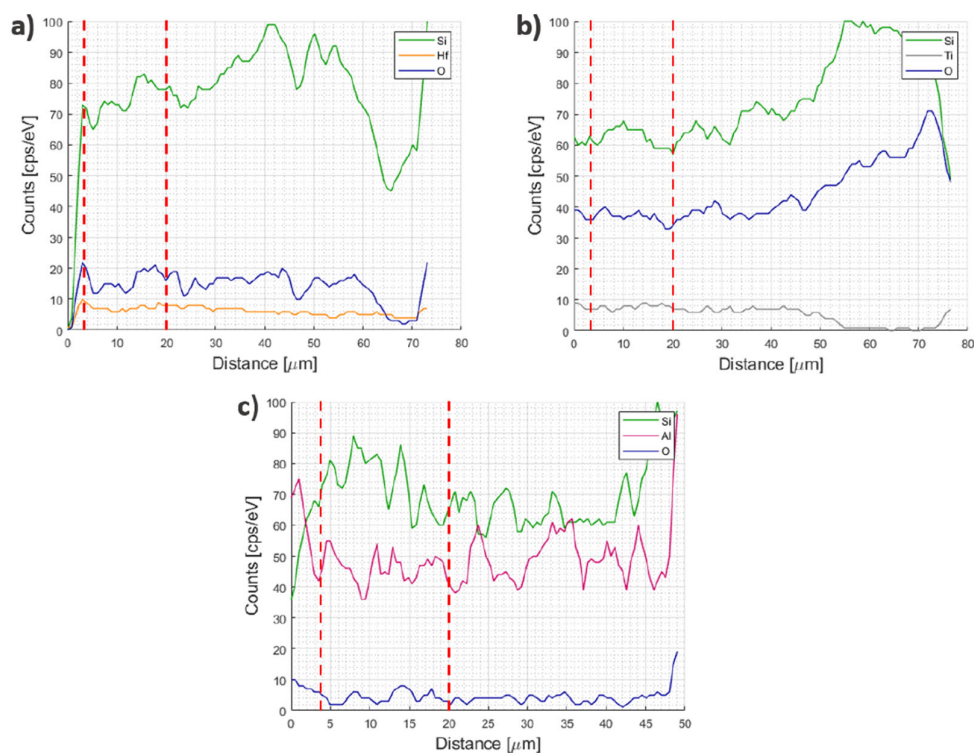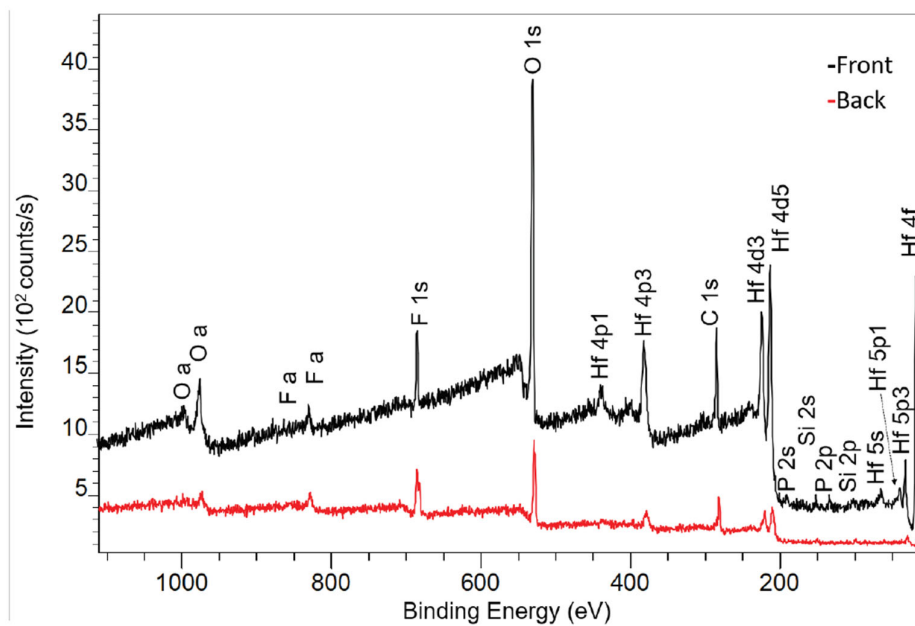

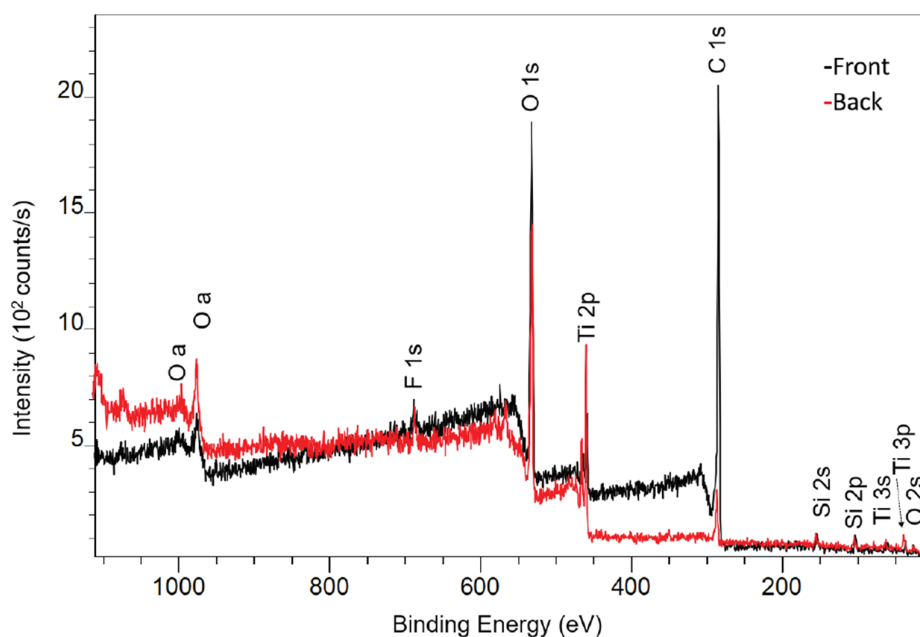

**Figure S6.** XPS survey spectra of the PSiO<sub>2</sub>/TiO<sub>2</sub> membrane front (black) and back (red). The main core levels are labeled. The data are normalized to each C-(C,H) component of the C 1s peak and separated vertically.

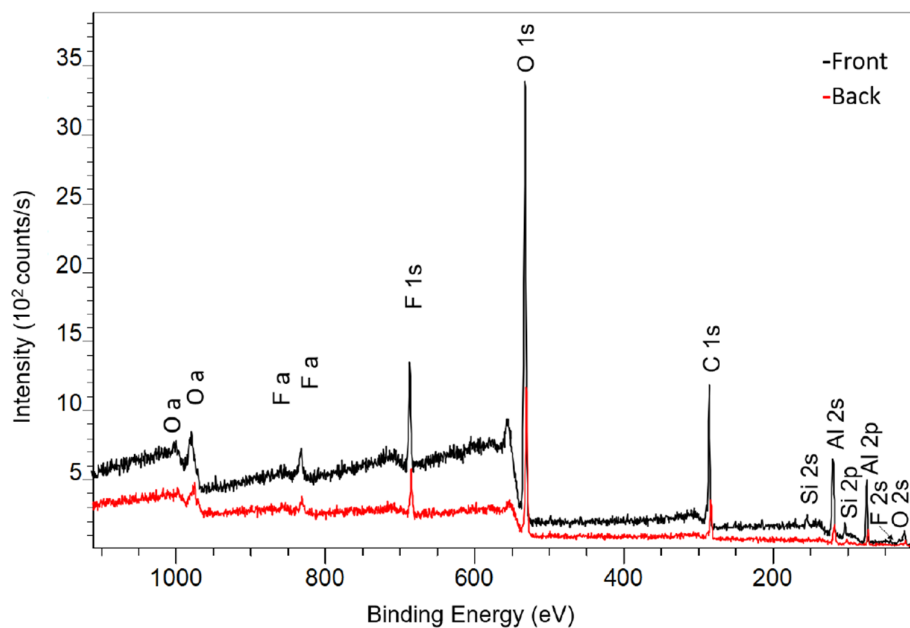

**Figure S7.** XPS survey spectra of the PSiO<sub>2</sub>/Al<sub>2</sub>O<sub>3</sub> membrane front (black) and back (red). The main core levels are labeled. The data are normalized to each C-(C,H) component of the C 1s peak and separated vertically.
